# Supplementary material for: Current management of Duchenne muscular dystrophy in the Middle East: expert report
Source: PubMed Central journal article supplement — Neurodegener Dis Manag. 2019 Jun 5;9(3):123–33. doi: 10.2217/nmt-2019-0002 (PMC6609894; doi:10.2217/nmt-2019-0002), 2019-06-05
Supplement: nmt-09-123-s1.pdf [file nmt-09-123-s1.pdf]

## Appendix 1. Advisory board

### Advisory board participants

| Name                     | Country | Comment   |
|--------------------------|---------|-----------|
| Dr Mohammed Al Jumah     | KSA     | Advisor   |
| Dr Mohammad Al Muhaizea  | KSA     | Advisor   |
| Dr Ahmed Al Rumayan      | KSA     | Advisor   |
| Dr Abdulaziz Al Saman    | KSA     | Advisor   |
| Dr Ali Al Shehri         | KSA     | Advisor   |
| Dr Edward Cupler         | KSA     | Moderator |
| Dr Samah Ishak           | KSA     | Advisor   |
| Dr Mohammed Jan          | KSA     | Advisor   |
| Dr Ayaz Shah             | KSA     | Advisor   |
| Dr Abubaker Al Madani    | UAE     | Advisor   |
| Dr Wassim Fathallah      | UAE     | Advisor   |
| Dr Pawan Kashyape        | UAE     | Advisor   |
| Dr Gururaj Kodavooru     | UAE     | Advisor   |
| Dr Cristina Skrypnyk     | BAHRAIN | Advisor   |
| Dr Gholamreza Zamani     | IRAN    | Advisor   |
| Dr Laila Bastaki         | KUWAIT  | Advisor   |
| Dr Andre Megarbane       | LEBANON | Advisor   |
| Dr Khalid Elthilily      | OMAN    | Advisor   |
| Dr Sylvie Tuffery Giraud | FRANCE  | Advisor   |
| Dr Andoni Urtizberea     | FRANCE  | Advisor   |
| Dr Carlos Ortez          | SPAIN   | Advisor   |

## Appendix 2. Questionnaire

### Discussion guide for MENA DMD expert meeting – 23 September, 2016

#### Facilities/Organization

Describe the **type of clinics** where DMD patients are mostly diagnosed and/or followed-up

- Public/private
- Dedicated neuromuscular clinic
- Multidisciplinary clinic (if any)

#### Referral process

1. What is the main source of DMD patients referral in your accounts?

- a. Pediatricians, child neurologists
- b. Neurologists
- c. Geneticists
- d. Family medicine
- e. Other specialties
- f. Teachers, relatives

2. What are the motives of the DMD patient referral?

- a. Muscle of weakness
- b. Isolated elevated of serum CK levels
- c. Walking delay/difficulty
- d. Frequent falling

- e. Genetic counseling/family history
- f. Other complications (e.g., cardiac, respiratory)

**Number of DMD patients**

- Approximate caseload of patients with muscular dystrophy and among them cases of DMD? .....
- Number of DMD patients with confirmed point mutation?.....
- Number of DMD patients with pending sequencing of the DMD gene? .....
- Number of DMD patients without MLPA or NGS? .....
- Approximate proportion of non-Nationals (from inside or outside the country) with DMD? .....

**Technical facilities:**

In your clinic do you have access to:

- DMD PCR genetic studies – locally  sent abroad
- DMD MLPA genetic studies – locally  sent abroad
- DMD mutation specific genetic studies - locally  sent abroad
- Muscle biopsy
- Respiratory investigations (FVC, others)
- Cardiac investigations (echocardiography)
- PGD (preimplantation genetic diagnosis)

**Staff**

Do you have in your team a dedicated MD to deal with DMD patients/neuromuscular patients

Yes  No

Is a physiotherapist or other paramedic assisting you in the clinic?

Yes  No

Would you like to support training for your physiotherapist in terms of managing DMD patients?

Yes  No

**Timeline**

Average time needed on average to reach a final diagnosis of DMD:

- Time between first symptoms and going to the physician
- Time between first referral and identification of a deletion/duplication in the DMD gene
- Time between first referral and identification of a point mutation in the DMD gene

**Diagnosis**

1. What are the current diagnostic steps for DMD patients in your countries?.....
2. What is the diagnostic algorithm for DMD patients in your countries?.....
3. Considering the availability of several means of DMD diagnosis at your disposal, which one would you adopt as a standard:

- a. Muscle Biopsy
- b. Multiplex PCR
- c. MLPA test
- d. MLPA test followed by sequencing of the DMD gene (if MLPA negative)
- e. Targeted exome sequencing – panel of genes (i.e, muscular dystrophies); What action would you take typically if negative result found?
- f. Whole exome sequencing

4. How could you/we improve the process of early point mutation detection in DMD patients?

- Is it a financial issue for you and/or the patients and relatives? Yes  No
- Do you need a regional center for DMD sequencing? Yes  No

- Would you suggest that we should screen all DMD patients with sequencing prior to any MLPA test?

Yes  No

- Would you like send your patients DNA abroad still for sequencing?

Yes  No

Do you envisage any obstacles with sending Dried Blood Spot (DBS) test samples abroad for sequencing?

### Data collection – registries

5. Do you collect the genetic and clinical information either formally or informally currently in some kind of repository? Yes  No

6. How important would it be to collect this information in a registry to support patient follow-up and publications? Yes  No

7. Do you feed (or would like to do so) registries for DMD patients

- At the national level Yes  No
- At the regional level (GCC) Yes  No
- At the international level (TREAT-NMD or others) Yes  No

### Natural history

8. What is the typical natural history for diagnosed DMD patients in the Middle East region, once a differential diagnosis has been made?.....

9. What is the typical life expectancy of DMD patients in the Middle East?.....

10. At what age do DMD patients typically become nonambulant on average (100% wheelchair use)?.....

11. What's the proportion of DMD patients being on corticosteroids? .....%

12. Do you feel these DMD patient management parameters have improved over the past 20 years in your country?

Yes  No

### Follow-up – outcome measures

13. Which clinical and patient-reported outcome measures are available in your clinic;

At ambulatory stage:

- Only symptoms and disabilities reported by patient and relatives Yes  No
- Manual muscle testing (MMT) Yes  No
- 6-min walking test (6MWT) Yes  No
- Other timed function tests Yes  No
- Functional scales (North Star Scale, MFM, others) Yes  No
- Myotools Yes  No
- Other (quality of care scales) Yes  No

At nonambulatory stage:

- Same as above Yes  No
- Respiratory and/or cardiac outcome measures? Yes  No

14. Which criteria do you use to define whether a DMD patient is nonambulatory relative to an ambulatory patient?.....

15. What are your experiences and feelings about the 6MWT?.....

16. How valid is 6MWT test as a standard outcome measure of DMD disease progression?

- In your clinical practice?
- In clinical research studies?.....

17. To what extent do you follow the international guidelines (standards of care)?

- Published by TREAT-MND or others Yes  No  Partially
- To what extent would it be helpful to have such guidelines adapted for our colleagues in the Middle-East region?

18. How many of your nonambulatory patients are on

- Noninvasive ventilation? .....
- Tracheotomy? .....

19. How many of them underwent spine surgery? .....

20. How many of them travel abroad:

- For second opinion in an expert neuromuscular center (and where precisely?) .....
- For nonconventional therapies (stem cell therapies, others)? .....

### Ataluren therapy

1. What is your current management approach for treatment of nonsense mutation DMD patients?

- a. Corticosteroids only
- b. Ataluren only
- c. Ataluren + corticosteroids

2. What would your optimal management approach for nonsense mutation DMD patients?.....

3. What are your treatment expectations regarding ataluren? (efficacy)

- a. Slowing disease progression
- b. Stabilization of symptoms
- c. Complete recovery
- d. Depends on the stage of the disease when treatment initiated, relative to natural history

4. Did you notice any side effect in your patients on Ataluren (safety)?; Would they prompt you to discontinue the treatment? Yes  No

5. How easy is it for you and your nonsense mutation patients to access ataluren treatment in your account and what could be done to accelerate and facilitate access?.....

6. What are the major obstacles? Diagnosis, reimbursement or other?.....

7. Considering that one of the key treatment objectives in DMD is to maintain muscle function,

- a. How would you address a patient who is nonambulatory, but has upper limb function?.....
- b. How would manage a patient on treatment that recently lost ambulation while on therapy?.....

8. If any, which your nonsense mutation DMD patients would you consider not treating with ataluren? Why?.....

### Patient support – awareness – education

21. What is required in terms of a patient awareness program or patient support program?

- a. Patient awareness sessions and materials
- b. Assigned nurse education
- c. School/kindergarten/sport teacher awareness programs
- d. Educational awareness sessions for different physician specialties
- e. Website, facebook or other social media

22. Is there a patient support group/organization in your country? Yes  No

- If so, is it dedicated to neuromuscular patients exclusively? Yes  No
- Or to rare diseases Yes  No
- Or to disabled people as a whole Yes  No

### *Prospects*

How do you feel **identification, management** and **treatment** of DMD patients can be improved in the Middle East?.....

What recommendations and tools would you propose for improving long-term outcomes in DMD patients in your country?.....
